# Supplementary material for: Evaluation of a Population-Based Targeted Screening Approach for Skin Cancer with Long-Time Follow-Up in Austria including Potential Effects on Melanoma Mortality
Source: MDPI journal article supplement (doi:10.3390/cancers16071283), 2024-03-26
Supplement: s1 [file s1]

**Table S1:** Characteristics of VHM-Skin, VHM-Health Exam, and *matched* VHM-Health Exam participants.

|                                                    | VHM-Skin           |                                | VHM-Health Exam    |                                | <i>matched</i> VHM-Health Exam |                                |
|----------------------------------------------------|--------------------|--------------------------------|--------------------|--------------------------------|--------------------------------|--------------------------------|
|                                                    | Full cohort        | Sub-cohort<br>(all covariates) | Full cohort        | Sub-cohort<br>(all covariates) | Full cohort                    | Sub-cohort<br>(all covariates) |
| <b>All</b>                                         |                    |                                |                    |                                |                                |                                |
| n                                                  | 8997               | 7543                           | 92,760             | 89,362                         | 26,991                         | 25,691                         |
| Age at baseline examination (years), mean $\pm$ SD | 40.0 $\pm$ 15.0    | 40.7 $\pm$ 14.6                | 44.8 $\pm$ 15.3    | 44.9 $\pm$ 15.3                | 40.0 $\pm$ 15.0                | 40.3 $\pm$ 15.0                |
| Follow-up* (years), median (IQR)                   | 26.8 (25.8 - 28.5) | 26.9 (25.8 - 28.6)             | 27.8 (25.4 - 29.3) | 27.9 (25.4 - 29.3)             | 26.8 (25.5 - 28.5)             | 26.8 (25.6 - 28.5)             |
| overall deaths, n (%)                              | 1438 (16.0%)       | 1193 (15.8%)                   | 24,210 (26.1%)     | 23,440 (26.2%)                 | 4994 (18.5%)                   | 4808 (18.7%)                   |
| Occupational status, n (%)                         | -                  | -                              | -                  | -                              | -                              | -                              |
| blue collar                                        |                    | 1514 (20.1%)                   |                    | 32,666 (36.6%)                 |                                | 8925 (34.8%)                   |
| white collar                                       |                    | 5422 (71.9%)                   |                    | 48,659 (54.4%)                 |                                | 14,266 (55.5%)                 |
| self-employed                                      |                    | 607 (8.0%)                     |                    | 8037 (9.0%)                    |                                | 2500 (9.7%)                    |
| BMI, mean $\pm$ SD                                 | -                  | 23.7 $\pm$ 3.8                 | -                  | 25.0 $\pm$ 4.2                 | -                              | 24.5 $\pm$ 4.4                 |
| <b>Women</b>                                       |                    |                                |                    |                                |                                |                                |
| n                                                  | 5528               | 4687                           | 51,412             | 49,736                         | 16,584                         | 15,905                         |
| Age at baseline examination (years), mean $\pm$ SD | 39.4 $\pm$ 14.9    | 40.0 $\pm$ 14.4                | 45.2 $\pm$ 15.8    | 45.3 $\pm$ 15.7                | 39.5 $\pm$ 14.9                | 39.6 $\pm$ 14.9                |
| Follow-up* (years), median (IQR)                   | 26.9 (25.8 - 28.6) | 27.0 (25.9 - 28.6)             | 28.0 (25.6 - 29.4) | 28.1 (25.7 - 29.4)             | 27.0 (25.6 - 28.6)             | 27.0 (25.7 - 28.6)             |
| overall deaths, n (%)                              | 771 (13.9%)        | 638 (13.6%)                    | 12,602 (24.5%)     | 12,185 (24.5%)                 | 2584 (15.6%)                   | 2493 (15.7%)                   |
| Occupational status, n (%)                         | -                  | -                              | -                  | -                              | -                              | -                              |
| blue collar                                        |                    | 1023 (21.8%)                   |                    | 18,768 (37.7%)                 |                                | 5367 (33.7%)                   |
| white collar                                       |                    | 3316 (70.8%)                   |                    | 27,182 (54.7%)                 |                                | 9128 (57.4%)                   |
| self-employed                                      |                    | 348 (7.4%)                     |                    | 3786 (7.6%)                    |                                | 1410 (8.9%)                    |
| BMI, mean $\pm$ SD                                 | -                  | 23.0 $\pm$ 4.0                 | -                  | 24.6 $\pm$ 4.6                 | -                              | 24.1 $\pm$ 4.7                 |
| <b>Men</b>                                         |                    |                                |                    |                                |                                |                                |
| n                                                  | 3469               | 2856                           | 41,348             | 39,626                         | 10,407                         | 9786                           |
| Age at baseline examination (years), mean $\pm$ SD | 40.8 $\pm$ 15.2    | 41.8 $\pm$ 14.8                | 44.3 $\pm$ 14.8    | 44.6 $\pm$ 14.7                | 40.8 $\pm$ 15.2                | 41.3 $\pm$ 15.2                |
| Follow-up* (years), median (IQR)                   | 26.7 (25.6 - 28.4) | 26.8 (25.6 - 28.4)             | 27.6 (25.2 - 29.2) | 27.7 (25.1 - 29.2)             | 26.7 (25.3 - 28.3)             | 26.7 (25.3 - 28.3)             |
| overall deaths, n (%)                              | 667 (19.2%)        | 555 (19.4%)                    | 11,608 (28.1%)     | 11,255 (28.4%)                 | 2410 (23.2%)                   | 2315 (23.7%)                   |
| Occupational status, n (%)                         | -                  | -                              | -                  | -                              | -                              | -                              |
| blue collar                                        |                    | 491 (17.2%)                    |                    | 13,898 (35.1%)                 |                                | 3558 (36.4%)                   |
| white collar                                       |                    | 2106 (73.7%)                   |                    | 21,477 (54.2%)                 |                                | 5138 (52.5%)                   |
| self-employed                                      |                    | 259 (9.1%)                     |                    | 4251 (10.7%)                   |                                | 1090 (11.1%)                   |
| BMI, mean $\pm$ SD                                 | -                  | 24.8 $\pm$ 3.1                 | -                  | 25.5 $\pm$ 3.5                 | -                              | 25.2 $\pm$ 3.6                 |

\* follow-up until death or end of study

**Table S2:** Yearly melanoma cases and deaths, and annual average population size in Vorarlberg 1995-2019.

| Year | New invasive melanoma diagnoses (C43) |       |      | New diagnoses of melanoma <i>in situ</i> (D03) |       |     | Deaths due to melanoma |       |     | Annual average population |         |         |
|------|---------------------------------------|-------|------|------------------------------------------------|-------|-----|------------------------|-------|-----|---------------------------|---------|---------|
|      | All                                   | Women | Men  | All                                            | Women | Men | All                    | Women | Men | All                       | Women   | Men     |
| 1985 | 23                                    | 18    | 5    | 4                                              | 3     | 1   | 9                      | 3     | 6   | 309 043                   | 158 094 | 150 949 |
| 1986 | 27                                    | 19    | 8    | 5                                              | 4     | 1   | 6                      | 3     | 3   | 311 237                   | 159 089 | 152 148 |
| 1987 | 26                                    | 12    | 14   | 1                                              | 1     | 0   | 9                      | 8     | 1   | 313 196                   | 160 000 | 153 196 |
| 1988 | 34                                    | 19    | 15   | 4                                              | 2     | 2   | 12                     | 6     | 6   | 315 419                   | 161 072 | 154 347 |
| 1989 | 27                                    | 15    | 12   | 5                                              | 5     | 0   | 10                     | 6     | 4   | 320 470                   | 163 423 | 157 047 |
| 1990 | 24                                    | 13    | 11   | 10                                             | 6     | 4   | 10                     | 5     | 5   | 326 594                   | 166 083 | 160 511 |
| 1991 | 33                                    | 17    | 16   | 7                                              | 4     | 3   | 11                     | 7     | 4   | 331 930                   | 168 354 | 163 576 |
| 1992 | 31                                    | 15    | 16   | 8                                              | 4     | 4   | 10                     | 2     | 8   | 336 160                   | 170 298 | 165 862 |
| 1993 | 58                                    | 31    | 27   | 37                                             | 24    | 13  | 8                      | 5     | 3   | 338 640                   | 171 428 | 167 212 |
| 1994 | 38                                    | 16    | 22   | 33                                             | 16    | 17  | 12                     | 2     | 10  | 340 471                   | 172 240 | 168 231 |
| 1995 | 47                                    | 26    | 21   | 30                                             | 18    | 12  | 4                      | 4     | 0   | 341 951                   | 173 033 | 168 918 |
| 1996 | 42                                    | 22    | 20   | 25                                             | 17    | 8   | 11                     | 5     | 6   | 343 135                   | 173 787 | 169 348 |
| 1997 | 60                                    | 27    | 33   | 35                                             | 20    | 15  | 8                      | 4     | 4   | 344 354                   | 174 499 | 169 855 |
| 1998 | 50                                    | 33    | 17   | 34                                             | 20    | 14  | 12                     | 5     | 7   | 345 766                   | 175 266 | 170 500 |
| 1999 | 43                                    | 25    | 18   | 24                                             | 18    | 6   | 14                     | 7     | 7   | 347 443                   | 176 101 | 171 342 |
| 2000 | 68                                    | 40    | 28   | 30                                             | 18    | 12  | 4                      | 1     | 3   | 349 257                   | 177 011 | 172 246 |
| 2001 | 56                                    | 30    | 26   | 24                                             | 13    | 11  | 9                      | 4     | 5   | 351 356                   | 177 980 | 173 376 |
| 2002 | 76                                    | 33    | 43   | 38                                             | 18    | 20  | 12                     | 5     | 7   | 353 635                   | 179 083 | 174 552 |
| 2003 | 77                                    | 32    | 45   | 52                                             | 29    | 23  | 7                      | 5     | 2   | 355 621                   | 180 123 | 175 498 |
| 2004 | 126                                   | 54    | 72   | 65                                             | 38    | 27  | 13                     | 6     | 7   | 358 521                   | 181 654 | 176 867 |
| 2005 | 121                                   | 52    | 69   | 50                                             | 23    | 27  | 13                     | 3     | 10  | 361 391                   | 183 113 | 178 278 |
| 2006 | 111                                   | 49    | 62   | 50                                             | 29    | 21  | 10                     | 8     | 2   | 363 389                   | 184 021 | 179 368 |
| 2007 | 82                                    | 31    | 51   | 50                                             | 31    | 19  | 16                     | 5     | 11  | 364 985                   | 184 977 | 180 008 |
| 2008 | 95                                    | 38    | 57   | 50                                             | 23    | 27  | 13                     | 7     | 6   | 366 397                   | 185 877 | 180 520 |
| 2009 | 109                                   | 58    | 51   | 64                                             | 29    | 35  | 12                     | 4     | 8   | 367 590                   | 186 569 | 181 021 |
| 2010 | 121                                   | 52    | 69   | 92                                             | 50    | 42  | 18                     | 11    | 7   | 368 894                   | 187 204 | 181 690 |
| 2011 | 95                                    | 46    | 49   | 99                                             | 46    | 53  | 12                     | 5     | 7   | 370 096                   | 187 901 | 182 195 |
| 2012 | 100                                   | 48    | 52   | 65                                             | 25    | 40  | 18                     | 8     | 10  | 371 697                   | 188 727 | 182 970 |
| 2013 | 104                                   | 56    | 48   | 62                                             | 30    | 32  | 10                     | 2     | 8   | 373 870                   | 189 642 | 184 228 |
| 2014 | 92                                    | 42    | 50   | 59                                             | 40    | 19  | 13                     | 4     | 9   | 376 973                   | 191 076 | 185 897 |
| 2015 | 109                                   | 55    | 54   | 51                                             | 26    | 25  | 16                     | 8     | 8   | 381 000                   | 192 650 | 188 350 |
| 2016 | 76                                    | 35    | 41   | 56                                             | 31    | 25  | 11                     | 5     | 6   | 386 708                   | 194 961 | 191 747 |
| 2017 | 97                                    | 37    | 60   | 76                                             | 28    | 48  | 14                     | 7     | 7   | 390 296                   | 196 730 | 193 566 |
| 2018 | 94                                    | 47    | 47   | 114                                            | 45    | 69  | 12                     | 4     | 8   | 393 025                   | 197 996 | 195 029 |
| 2019 | 91                                    | 36    | 55   | 83                                             | 42    | 41  | 14                     | 6     | 8   | 395 949                   | 199 401 | 196 548 |
| Σ    | 2463                                  | 1179  | 1284 | 1492                                           | 776   | 716 | 393                    | 180   | 213 |                           |         |         |

**Table S3:** Hazard ratios for incident invasive melanoma and melanoma *in situ* diagnoses as well as melanoma deaths in VHM-Skin vs. VHM-Health Exam as reference for follow-up intervals as indicated by gender, including occupational status and BMI as covariates, Vorarlberg Province, Austria, 1989-2019. N, individuals in the VHM-Health Exam cohort; n, individuals in the VHM-Skin cohort

|                          | Incident invasive melanoma (C43) |                                              |                  |                  |                  | Incident melanoma <i>in situ</i> (D03) |                                              |                   |                  |                  | Melanoma deaths  |
|--------------------------|----------------------------------|----------------------------------------------|------------------|------------------|------------------|----------------------------------------|----------------------------------------------|-------------------|------------------|------------------|------------------|
|                          | Full follow-up                   | Follow-up until Dec. 31 <sup>st</sup> , 1994 | 0-10 years       | >10-20 years     | 20+ years        | Full follow-up                         | Follow-up until Dec. 31 <sup>st</sup> , 1994 | 0-10 years        | >10-20 years     | 20+ years        | Full follow-up   |
| <b>All</b>               |                                  |                                              |                  |                  |                  |                                        |                                              |                   |                  |                  |                  |
| (sub)cohort size, n / N  | 7543 / 89,362                    | 7543 / 89,362                                | 7543 / 89,362    | 7289 / 83,905    | 6785 / 75,222    | 7543 / 89,362                          | 7543 / 89,362                                | 7543 / 89,362     | 7295 / 83,955    | 6810 / 75,337    | 7543 / 89,362    |
| cases, n / N             | 182 / 765                        | 25 / 26                                      | 51 / 155         | 88 / 333         | 43 / 277         | 160 / 547                              | 16 / 21                                      | 45 / 92           | 65 / 222         | 50 / 233         | 12 / 93          |
| HR (95%-CI) <sup>a</sup> | 3.07 (2.61-3.61)                 | 18.22 (10.43-31.84)                          | 4.34 (3.16-5.97) | 3.30 (2.61-4.18) | 2.06 (1.49-2.84) | 3.86 (3.23-4.61)                       | 15.32 (7.89-29.77)                           | 6.78 (4.73-9.71)  | 3.60 (2.73-4.75) | 2.99 (2.20-4.06) | 1.84 (1.01-3.37) |
| HR (95%-CI) <sup>b</sup> | 2.96 (2.51-3.48)                 | 18.32 (10.37-32.36)                          | 4.15 (3.01-5.74) | 3.15 (2.48-3.99) | 2.02 (1.46-2.80) | 3.67 (3.07-4.39)                       | 14.87 (7.56-29.26)                           | 6.51 (4.52-9.37)  | 3.40 (2.56-4.50) | 2.84 (2.08-3.88) | 1.86 (1.02-3.42) |
| <b>Women</b>             |                                  |                                              |                  |                  |                  |                                        |                                              |                   |                  |                  |                  |
| (sub)cohort size, n / N  | 4687 / 49,736                    | 4687 / 49,736                                | 4687 / 49,736    | 4577 / 47,199    | 4316 / 42,667    | 4687 / 49,736                          | 4687 / 49,736                                | 4687 / 49,736     | 4569 / 47,227    | 4309 / 42,718    | 4687 / 49,736    |
| cases, n / N             | 83 / 357                         | 10 / 11                                      | 22 / 84          | 41 / 150         | 20 / 123         | 98 / 270                               | 8 / 12                                       | 29 / 52           | 41 / 108         | 28 / 110         | 6 / 35           |
| HR (95%-CI) <sup>c</sup> | 2.58 (2.03-3.28)                 | 16.74 (6.97-40.21)                           | 3.11 (1.93-4.99) | 2.96 (2.09-4.19) | 1.77 (1.10-2.85) | 4.26 (3.37-5.38)                       | 12.01 (4.79-30.11)                           | 7.30 (4.60-11.56) | 4.09 (2.84-5.87) | 3.09 (2.03-4.70) | 2.23 (0.94-5.34) |
| HR (95%-CI) <sup>d</sup> | 2.49 (1.95-3.17)                 | 17.06 (7.01-41.53)                           | 2.96 (1.84-4.78) | 2.81 (1.98-4.00) | 1.76 (1.09-2.84) | 4.12 (3.25-5.22)                       | 10.17 (3.99-25.96)                           | 6.84 (4.29-10.91) | 4.08 (2.83-5.90) | 2.94 (1.93-4.49) | 2.39 (0.99-5.76) |
| <b>Men</b>               |                                  |                                              |                  |                  |                  |                                        |                                              |                   |                  |                  |                  |
| (sub)cohort size, n / N  | 2856 / 39,626                    | 2856 / 39,626                                | 2856 / 39,626    | 2712 / 36,706    | 2469 / 32,555    | 2856 / 39,626                          | 2856 / 39,626                                | 2856 / 39,626     | 2726 / 36,728    | 2501 / 32,619    | 2856 / 39,626    |
| cases, n / N             | 99 / 408                         | 15 / 15                                      | 29 / 71          | 47 / 183         | 23 / 154         | 62 / 277                               | 8 / 9                                        | 16 / 40           | 24 / 114         | 22 / 123         | 6 / 58           |
| HR (95%-CI) <sup>c</sup> | 3.54 (2.84-4.41)                 | 20.05 (9.71-41.43)                           | 5.99 (3.88-9.23) | 3.60 (2.61-4.96) | 2.28 (1.47-3.54) | 3.33 (2.53-4.39)                       | 19.77 (7.52-51.99)                           | 6.01 (3.36-10.74) | 2.94 (1.89-4.56) | 2.82 (1.79-4.45) | 1.55 (0.67-3.59) |
| HR (95%-CI) <sup>d</sup> | 3.42 (2.74-4.27)                 | 19.64 (9.36-41.20)                           | 5.82 (3.75-9.05) | 3.42 (2.47-4.73) | 2.26 (1.45-3.51) | 3.11 (2.35-4.11)                       | 22.44 (8.40-60.00)                           | 6.00 (3.32-10.82) | 2.61 (1.67-4.07) | 2.69 (1.70-4.26) | 1.50 (0.64-3.49) |

Adjusted for: <sup>a</sup> baseline age and sex; <sup>b</sup> baseline age, sex, occupational status, and BMI; <sup>c</sup> baseline age; <sup>d</sup> baseline age, occupational status, and BMI

**Table S4:** Hazard ratios for incident invasive melanoma and melanoma *in situ* diagnoses as well as melanoma deaths in VHM-Skin vs. *matched* VHM-Health Exam as reference for follow-up intervals as indicated by gender, not including (upper part) and including (lower part) occupational status and BMI as covariates, Vorarlberg Province, Austria, 1989-2019. N, individuals in the matched VHM-Health Exam cohort; n, individuals in the VHM-Skin cohort

|                          |  | Incident invasive melanoma (C43) |                                              |                  |                  |                  | Incident melanoma <i>in situ</i> (D03) |                                              |                  |                  |                  | Melanoma deaths   |
|--------------------------|--|----------------------------------|----------------------------------------------|------------------|------------------|------------------|----------------------------------------|----------------------------------------------|------------------|------------------|------------------|-------------------|
|                          |  | Full follow-up                   | Follow-up until Dec. 31 <sup>st</sup> , 1994 | 0-10 years       | >10-20 years     | 20+ years        | Full follow-up                         | Follow-up until Dec. 31 <sup>st</sup> , 1994 | 0-10 years       | >10-20 years     | 20+ years        | Full follow-up    |
| Matched cohorts          |  |                                  |                                              |                  |                  |                  |                                        |                                              |                  |                  |                  |                   |
| All                      |  |                                  |                                              |                  |                  |                  |                                        |                                              |                  |                  |                  |                   |
| (sub)cohort size, n / N  |  | 8997 / 26,991                    | 8997 / 26,991                                | 8997 / 26,991    | 8644 / 25,789    | 8045 / 23,859    | 8997 / 26,991                          | 8997 / 26,991                                | 8997 / 26,991    | 8653 / 25,804    | 8066 / 23,895    | 8997 / 26,991     |
| cases, n / N             |  | 207 / 218                        | 30 / 8                                       | 61 / 57          | 99 / 90          | 47 / 71          | 187 / 149                              | 17 / 10                                      | 50 / 38          | 80 / 58          | 57 / 53          | 16 / 21           |
| HR (95%-CI) <sup>a</sup> |  | 2.82 (2.33-3.41)                 | 11.27 (5.17-24.58)                           | 3.20 (2.23-4.60) | 3.24 (2.44-4.32) | 1.92 (1.33-2.78) | 3.73 (3.01-4.62)                       | 5.12 (2.35-11.19)                            | 3.94 (2.58-6.00) | 4.08 (2.91-5.72) | 3.13 (2.15-4.55) | 2.24 (1.17-4.29)  |
| Women                    |  |                                  |                                              |                  |                  |                  |                                        |                                              |                  |                  |                  |                   |
| (sub)cohort size, n / N  |  | 5528 / 16,584                    | 5528 / 16,584                                | 5528 / 16,584    | 5366 / 16,041    | 5052 / 15,039    | 5528 / 16,584                          | 5528 / 16,584                                | 5528 / 16,584    | 5359 / 16,048    | 5040 / 15,054    | 5528 / 16,584     |
| cases, n / N             |  | 95 / 111                         | 14 / 4                                       | 29 / 33          | 45 / 44          | 21 / 34          | 115 / 89                               | 9 / 7                                        | 33 / 24          | 49 / 34          | 33 / 31          | 8 / 6             |
| HR (95%-CI) <sup>b</sup> |  | 2.55 (1.94-3.36)                 | 10.45 (3.44-31.74)                           | 2.63 (1.60-4.34) | 3.04 (2.01-4.61) | 1.83 (1.06-3.15) | 3.86 (2.93-5.09)                       | 3.87 (1.44-10.40)                            | 4.12 (2.44-6.97) | 4.30 (2.78-6.66) | 3.16 (1.93-5.15) | 3.96 (1.37-11.40) |
| Men                      |  |                                  |                                              |                  |                  |                  |                                        |                                              |                  |                  |                  |                   |
| (sub)cohort size, n / N  |  | 3469 / 10,407                    | 3469 / 10,407                                | 3469 / 10,407    | 3278 / 9748      | 2993 / 8820      | 3469 / 10,407                          | 3469 / 10,407                                | 3469 / 10,407    | 3294 / 9756      | 3026 / 8841      | 3469 / 10,407     |
| cases, n / N             |  | 112 / 107                        | 16 / 4                                       | 32 / 24          | 54 / 46          | 26 / 37          | 72 / 60                                | 8 / 3                                        | 17 / 14          | 31 / 24          | 24 / 22          | 8 / 15            |
| HR (95%-CI) <sup>b</sup> |  | 3.10 (2.38-4.04)                 | 12.09 (4.04-36.17)                           | 3.99 (2.35-6.77) | 3.43 (2.31-5.08) | 1.99 (1.21-3.29) | 3.53 (2.50-4.97)                       | 8.04 (2.13-30.31)                            | 3.63 (1.79-7.36) | 3.75 (2.20-6.38) | 3.07 (1.72-5.48) | 1.56 (0.66-3.67)  |

Table S4: continued

|                                        |                  | Incident invasive melanoma (C43) |                                              |                  |                  |                  | Incident melanoma <i>in situ</i> (D03) |                                              |                  |                  |                   | Melanoma deaths   |
|----------------------------------------|------------------|----------------------------------|----------------------------------------------|------------------|------------------|------------------|----------------------------------------|----------------------------------------------|------------------|------------------|-------------------|-------------------|
|                                        |                  | Full follow-up                   | Follow-up until Dec. 31 <sup>st</sup> , 1994 | 0-10 years       | >10-20 years     | 20+ years        | Full follow-up                         | Follow-up until Dec. 31 <sup>st</sup> , 1994 | 0-10 years       | >10-20 years     | 20+ years         | Full follow-up    |
| Matched cohorts, additional covariates |                  |                                  |                                              |                  |                  |                  |                                        |                                              |                  |                  |                   |                   |
| All                                    |                  |                                  |                                              |                  |                  |                  |                                        |                                              |                  |                  |                   |                   |
| (sub)cohort size, n / N                | 7543 / 25,691    | 7543 / 25,691                    | 7543 / 25,691                                | 7289 / 24,537    | 6785 / 22,679    | 7543 / 25,691    | 7543 / 25,691                          | 7543 / 25,691                                | 7295 / 24,551    | 6810 / 22,715    | 7543 / 25,691     | 7543 / 25,691     |
| cases, n / N                           | 182 / 211        | 25 / 7                           | 51 / 54                                      | 88 / 89          | 43 / 68          | 160 / 146        | 16 / 10                                | 45 / 37                                      | 65 / 56          | 50 / 53          | 12 / 20           | 12 / 20           |
| HR (95%-CI) <sup>c</sup>               | 2.84 (2.33-3.46) | 12.17 (5.26-28.14)               | 3.17 (2.16-4.65)                             | 3.26 (2.43-4.37) | 2.04 (1.39-2.99) | 3.58 (2.86-4.48) | 5.59 (2.54-12.33)                      | 4.08 (2.64-6.30)                             | 3.83 (2.68-5.47) | 3.02 (2.05-4.45) | 1.88 (0.92-3.85)  | 1.88 (0.92-3.85)  |
| HR (95%-CI) <sup>d</sup>               | 2.72 (2.22-3.33) | 11.39 (4.86-26.67)               | 2.96 (2.00-4.37)                             | 3.09 (2.29-4.17) | 2.02 (1.37-2.98) | 3.42 (2.72-4.30) | 5.47 (2.45-12.23)                      | 3.94 (2.53-6.14)                             | 3.58 (2.49-5.16) | 2.94 (1.98-4.36) | 1.74 (0.84-3.61)  | 1.74 (0.84-3.61)  |
| Women                                  |                  |                                  |                                              |                  |                  |                  |                                        |                                              |                  |                  |                   |                   |
| (sub)cohort size, n / N                | 4687 / 15,905    | 4687 / 15,905                    | 4687 / 15,905                                | 4577 / 15,384    | 4316 / 14,417    | 4687 / 15,905    | 4687 / 15,905                          | 4687 / 15,905                                | 4569 / 15,391    | 4309 / 14,432    | 4687 / 15,905     | 4687 / 15,905     |
| cases, n / N                           | 83 / 108         | 10 / 4                           | 22 / 32                                      | 41 / 44          | 20 / 32          | 98 / 88          | 8 / 7                                  | 29 / 23                                      | 41 / 34          | 28 / 31          | 6 / 6             | 6 / 6             |
| HR (95%-CI) <sup>e</sup>               | 2.55 (1.92-3.39) | 8.46 (2.65-26.98)                | 2.30 (1.34-3.97)                             | 3.10 (2.02-4.74) | 2.07 (1.18-3.61) | 3.67 (2.75-4.90) | 4.02 (1.46-11.08)                      | 4.25 (2.46-7.35)                             | 4.03 (2.56-6.35) | 2.95 (1.77-4.92) | 3.26 (1.05-10.10) | 3.26 (1.05-10.10) |
| HR (95%-CI) <sup>f</sup>               | 2.48 (1.86-3.32) | 9.07 (2.80-29.45)                | 2.22 (1.28-3.86)                             | 2.96 (1.92-4.57) | 2.11 (1.19-3.73) | 3.55 (2.65-4.76) | 3.64 (1.30-10.19)                      | 3.92 (2.25-6.84)                             | 3.94 (2.48-6.25) | 2.95 (1.75-4.97) | 3.34 (1.05-10.58) | 3.34 (1.05-10.58) |
| Men                                    |                  |                                  |                                              |                  |                  |                  |                                        |                                              |                  |                  |                   |                   |
| (sub)cohort size, n / N                | 2856 / 9786      | 2856 / 9786                      | 2856 / 9786                                  | 2712 / 9153      | 2469 / 8262      | 2856 / 9786      | 2856 / 9786                            | 2856 / 9786                                  | 2726 / 9160      | 2501 / 8283      | 2856 / 9786       | 2856 / 9786       |
| cases, n / N                           | 99 / 103         | 15 / 3                           | 29 / 22                                      | 47 / 45          | 23 / 36          | 62 / 58          | 8 / 3                                  | 16 / 14                                      | 24 / 22          | 22 / 22          | 6 / 14            | 6 / 14            |
| HR (95%-CI) <sup>e</sup>               | 3.13 (2.38-4.13) | 17.25 (4.99-59.59)               | 4.43 (2.55-7.71)                             | 3.40 (2.26-5.13) | 2.00 (1.19-3.38) | 3.42 (2.39-4.89) | 9.27 (2.46-34.96)                      | 3.81 (1.86-7.81)                             | 3.49 (1.96-6.23) | 3.10 (1.71-5.60) | 1.32 (0.51-3.42)  | 1.32 (0.51-3.42)  |
| HR (95%-CI) <sup>f</sup>               | 2.95 (2.22-3.92) | 13.43 (3.85-46.89)               | 3.95 (2.24-6.97)                             | 3.22 (2.12-4.90) | 1.97 (1.15-3.36) | 3.20 (2.22-4.62) | 9.51 (2.46-36.72)                      | 3.94 (1.89-8.23)                             | 3.05 (1.69-5.50) | 2.93 (1.60-5.37) | 1.18 (0.45-3.10)  | 1.18 (0.45-3.10)  |

Adjusted for: <sup>a</sup> baseline age (only >10–20 years and 20+ years) and sex; <sup>b</sup> baseline age (only >10–20 years and 20+ years); <sup>c</sup> baseline age and sex; <sup>d</sup> baseline age, sex, occupational status, and BMI; <sup>e</sup> baseline age; <sup>f</sup> baseline age, occupational status, and BMI

**Table S5:** Breslow thickness and Clark's level at diagnosis of invasive melanoma throughout the study period 1989-2019 in VHM-Skin vs. VHM-Health Exam, vs. *matched* VHM-Health Exam, and vs. the GP-CC by gender. The analyses included BMI and occupational status as additional covariates. IQR, interquartile range; SD, standard deviation

|                                       | VHM-Skin |               | VHM-Health Exam |               | <i>p</i> * | <i>p</i> ** | <i>matched</i> VHM-Health Exam |               | <i>p</i> * | <i>p</i> ** | GP-CC |               | <i>p</i> *** |
|---------------------------------------|----------|---------------|-----------------|---------------|------------|-------------|--------------------------------|---------------|------------|-------------|-------|---------------|--------------|
| <u>Breslow thickness (mm)</u>         |          |               |                 |               |            |             |                                |               |            |             |       |               |              |
|                                       | n        | median (IQR)  | n               | median (IQR)  |            |             | n                              | median (IQR)  |            |             | n     | median (IQR)  |              |
| Full cohort                           |          |               |                 |               |            |             |                                |               |            |             |       |               |              |
| all                                   | 185      | 0.5 (0.3-0.8) | 652             | 0.6 (0.4-1.3) | <0.05      | -           | 180                            | 0.6 (0.4-1.1) | 0.10       | -           | 1443  | 0.6 (0.4-1.4) | <0.01        |
| women                                 | 84       | 0.5 (0.3-0.8) | 298             | 0.6 (0.4-1.2) | 0.29       | -           | 91                             | 0.5 (0.3-0.9) | 0.91       | -           | 631   | 0.6 (0.4-1.4) | 0.11         |
| men                                   | 101      | 0.5 (0.3-0.8) | 354             | 0.6 (0.4-1.3) | <0.05      | -           | 89                             | 0.7 (0.4-1.4) | <0.05      | -           | 812   | 0.7 (0.4-1.5) | <0.05        |
| Sub-cohort with additional covariates |          |               |                 |               |            |             |                                |               |            |             |       |               |              |
| all                                   | 165      | 0.5 (0.3-0.8) | 635             | 0.6 (0.4-1.3) | <0.05      | 0.09        | 174                            | 0.6 (0.4-1.0) | 0.14       | 0.16        |       |               |              |
| women                                 | 75       | 0.5 (0.3-0.7) | 291             | 0.6 (0.4-1.2) | 0.34       | 0.44        | 88                             | 0.5 (0.3-0.9) | 0.99       | 0.99        |       |               |              |
| men                                   | 90       | 0.5 (0.3-0.8) | 344             | 0.6 (0.4-1.3) | 0.05       | 0.12        | 86                             | 0.6 (0.4-1.4) | <0.05      | 0.05        |       |               |              |
| <u>Clark's level (1-5)</u>            |          |               |                 |               |            |             |                                |               |            |             |       |               |              |
|                                       | n        | mean ± SD     | n               | mean ± SD     |            |             | n                              | mean ± SD     |            |             | n     | mean ± SD     |              |
| Full cohort                           |          |               |                 |               |            |             |                                |               |            |             |       |               |              |
| all                                   | 176      | 3.0 ± 0.7     | 630             | 3.1 ± 0.8     | <0.05      | -           | 185                            | 3.2 ± 0.9     | 0.06       | -           | 1368  | 3.2 ± 0.9     | <0.01        |
| women                                 | 81       | 3.0 ± 0.8     | 295             | 3.1 ± 0.8     | 0.36       | -           | 96                             | 3.0 ± 0.9     | 0.06       | -           | 744   | 3.1 ± 0.9     | 0.11         |
| men                                   | 95       | 3.0 ± 0.6     | 335             | 3.1 ± 0.9     | <0.05      | -           | 89                             | 3.3 ± 0.8     | <0.01      | -           | 624   | 3.2 ± 0.8     | <0.01        |
| Sub-cohort with additional covariates |          |               |                 |               |            |             |                                |               |            |             |       |               |              |
| all                                   | 158      | 3.0 ± 0.7     | 614             | 3.1 ± 0.8     | 0.08       | 0.17        | 179                            | 3.2 ± 0.9     | <0.05      | <0.05       |       |               |              |
| women                                 | 72       | 2.9 ± 0.8     | 289             | 3.1 ± 0.8     | 0.42       | 0.49        | 94                             | 3.0 ± 0.9     | 0.15       | 0.14        |       |               |              |
| men                                   | 86       | 3.0 ± 0.6     | 325             | 3.2 ± 0.9     | <0.05      | <0.05       | 85                             | 3.3 ± 0.8     | <0.01      | <0.05       |       |               |              |

\* adjusted for baseline age, and sex (all)

\*\* adjusted for baseline age, sex (all), occupational status, and BMI

\*\*\* adjusted for baseline age, and sex (all); in the general population, baseline age was age on July 1<sup>st</sup>, 1993 (see Methods section)

**Table S6:** Breslow thickness, Clark's level, and T score at diagnosis of invasive melanoma in VHM-Skin (1989-1994) vs. VHM-Health Exam (1989-2002), vs. *matched* VHM-Health Exam (1989-2002), and vs. the GP-CC (1993-2002) by gender. The analyses included BMI and occupational status as additional covariates. IQR, interquartile range; SD, standard deviation

|                                       | VHM-Skin |                     | VHM-Health Exam |                     | <i>p</i> * | <i>p</i> ** | <i>matched</i> VHM-Health Exam |                     | <i>p</i> * | <i>p</i> ** | GP-CC    |                     | <i>p</i> *** |
|---------------------------------------|----------|---------------------|-----------------|---------------------|------------|-------------|--------------------------------|---------------------|------------|-------------|----------|---------------------|--------------|
| <u>Breslow thickness (mm)</u>         |          |                     |                 |                     |            |             |                                |                     |            |             |          |                     |              |
|                                       | <u>n</u> | <u>median (IQR)</u> | <u>n</u>        | <u>median (IQR)</u> |            |             | <u>n</u>                       | <u>median (IQR)</u> |            |             | <u>n</u> | <u>median (IQR)</u> |              |
| Full cohort                           |          |                     |                 |                     |            |             |                                |                     |            |             |          |                     |              |
| all                                   | 22       | 0.7 (0.4-1.4)       | 93              | 0.7 (0.4-1.3)       | 0.71       | -           | 26                             | 0.5 (0.3-0.8)       | 0.15       | -           | 202      | 0.7 (0.4-1.3)       | 0.67         |
| women                                 | 10       | 0.7 (0.4-1.2)       | 49              | 0.6 (0.4-1.0)       | 0.65       | -           | 14                             | 0.5 (0.3-0.6)       | 0.11       | -           | 99       | 0.6 (0.4-1.0)       | 0.84         |
| men                                   | 12       | 0.7 (0.4-1.5)       | 44              | 0.7 (0.4-1.9)       | 0.92       | -           | 12                             | 0.6 (0.4-0.9)       | 0.59       | -           | 103      | 0.8 (0.4-1.6)       | 0.84         |
| Sub-cohort with additional covariates |          |                     |                 |                     |            |             |                                |                     |            |             |          |                     |              |
| all                                   | 18       | 0.7 (0.4-1.2)       | 90              | 0.7 (0.4-1.3)       | 0.72       | 0.74        | 24                             | 0.5 (0.3-0.8)       | 0.13       | 0.13        |          |                     |              |
| women                                 | 7        | 0.7 (0.4-0.8)       | 48              | 0.7 (0.4-1.1)       | 0.38       | 0.36        | 13                             | 0.4 (0.3-0.6)       | 0.22       | 0.22        |          |                     |              |
| men                                   | 11       | 0.8 (0.5-1.5)       | 42              | 0.7 (0.4-2.0)       | 0.85       | 0.67        | 11                             | 0.6 (0.4-0.8)       | 0.23       | 0.31        |          |                     |              |
| <u>Clark's level (1-5)</u>            |          |                     |                 |                     |            |             |                                |                     |            |             |          |                     |              |
|                                       | <u>n</u> | <u>mean ± SD</u>    | <u>n</u>        | <u>mean ± SD</u>    |            |             | <u>n</u>                       | <u>mean ± SD</u>    |            |             | <u>n</u> | <u>mean ± SD</u>    |              |
| Full cohort                           |          |                     |                 |                     |            |             |                                |                     |            |             |          |                     |              |
| all                                   | 25       | 3.1 ± 0.8           | 143             | 3.0 ± 0.9           | 0.48       | -           | 42                             | 2.8 ± 0.8           | 0.24       | -           | 302      | 3.0 ± 0.9           | 0.53         |
| women                                 | 12       | 3.1 ± 0.8           | 75              | 2.9 ± 0.9           | 0.98       | -           | 25                             | 2.6 ± 0.8           | 0.34       | -           | 156      | 2.9 ± 0.8           | 0.73         |
| men                                   | 13       | 3.2 ± 0.8           | 68              | 3.0 ± 0.9           | 0.71       | -           | 17                             | 3.2 ± 0.7           | 0.98       | -           | 146      | 3.1 ± 0.9           | 0.77         |
| Sub-cohort with additional covariates |          |                     |                 |                     |            |             |                                |                     |            |             |          |                     |              |
| all                                   | 21       | 3.0 ± 0.8           | 138             | 3.0 ± 0.9           | 0.74       | 0.78        | 39                             | 2.8 ± 0.8           | 0.36       | 0.43        |          |                     |              |
| women                                 | 8        | 2.9 ± 0.8           | 73              | 2.9 ± 0.9           | 0.73       | 0.96        | 24                             | 2.6 ± 0.8           | 0.52       | 0.35        |          |                     |              |
| men                                   | 13       | 3.2 ± 0.8           | 65              | 3.0 ± 0.9           | 0.73       | 0.46        | 15                             | 3.1 ± 0.7           | 0.71       | 0.50        |          |                     |              |

**Table S6:** continued

|                                              | VHM-Skin |           | VHM-Health Exam |           | <i>p</i> * | <i>p</i> ** | <i>matched</i> VHM-Health Exam |           | <i>p</i> * | <i>p</i> ** | GP-CC |           | <i>p</i> *** |
|----------------------------------------------|----------|-----------|-----------------|-----------|------------|-------------|--------------------------------|-----------|------------|-------------|-------|-----------|--------------|
| <u>T stage (1-4)</u>                         | n        | mean ± SD | n               | mean ± SD |            |             | n                              | mean ± SD |            |             | n     | mean ± SD |              |
| <b>Full cohort</b>                           |          |           |                 |           |            |             |                                |           |            |             |       |           |              |
| all                                          | 28       | 2.2 ± 0.8 | 174             | 2.1 ± 1.0 | 0.80       | -           | 46                             | 1.9 ± 0.8 | 0.14       | -           | 359   | 2.2 ± 1.0 | 0.98         |
| women                                        | 14       | 2.1 ± 0.9 | 92              | 2.1 ± 0.9 | 0.84       | -           | 26                             | 1.7 ± 0.7 | 0.31       | -           | 184   | 2.2 ± 0.9 | 0.65         |
| men                                          | 14       | 2.2 ± 0.8 | 82              | 2.2 ± 1.0 | 0.96       | -           | 20                             | 2.1 ± 0.8 | 0.76       | -           | 175   | 2.2 ± 1.0 | 0.88         |
| <b>Sub-cohort with additional covariates</b> |          |           |                 |           |            |             |                                |           |            |             |       |           |              |
| all                                          | 24       | 2.1 ± 0.9 | 165             | 2.1 ± 1.0 | 0.88       | 0.82        | 43                             | 1.8 ± 0.8 | 0.19       | 0.21        |       |           |              |
| women                                        | 10       | 2.0 ± 0.9 | 86              | 2.0 ± 0.9 | 0.91       | 0.99        | 25                             | 1.7 ± 0.7 | 0.47       | 0.47        |       |           |              |
| men                                          | 14       | 2.2 ± 0.8 | 79              | 2.2 ± 1.0 | 0.98       | 0.52        | 18                             | 2.0 ± 0.8 | 0.50       | 0.36        |       |           |              |

\* adjusted for baseline age, and sex (all)

\*\* adjusted for baseline age, sex (all), occupational status, and BMI

\*\*\* adjusted for baseline age, and sex (all); in the general population, baseline age was age on July 1<sup>st</sup>, 1993 (see Methods section)



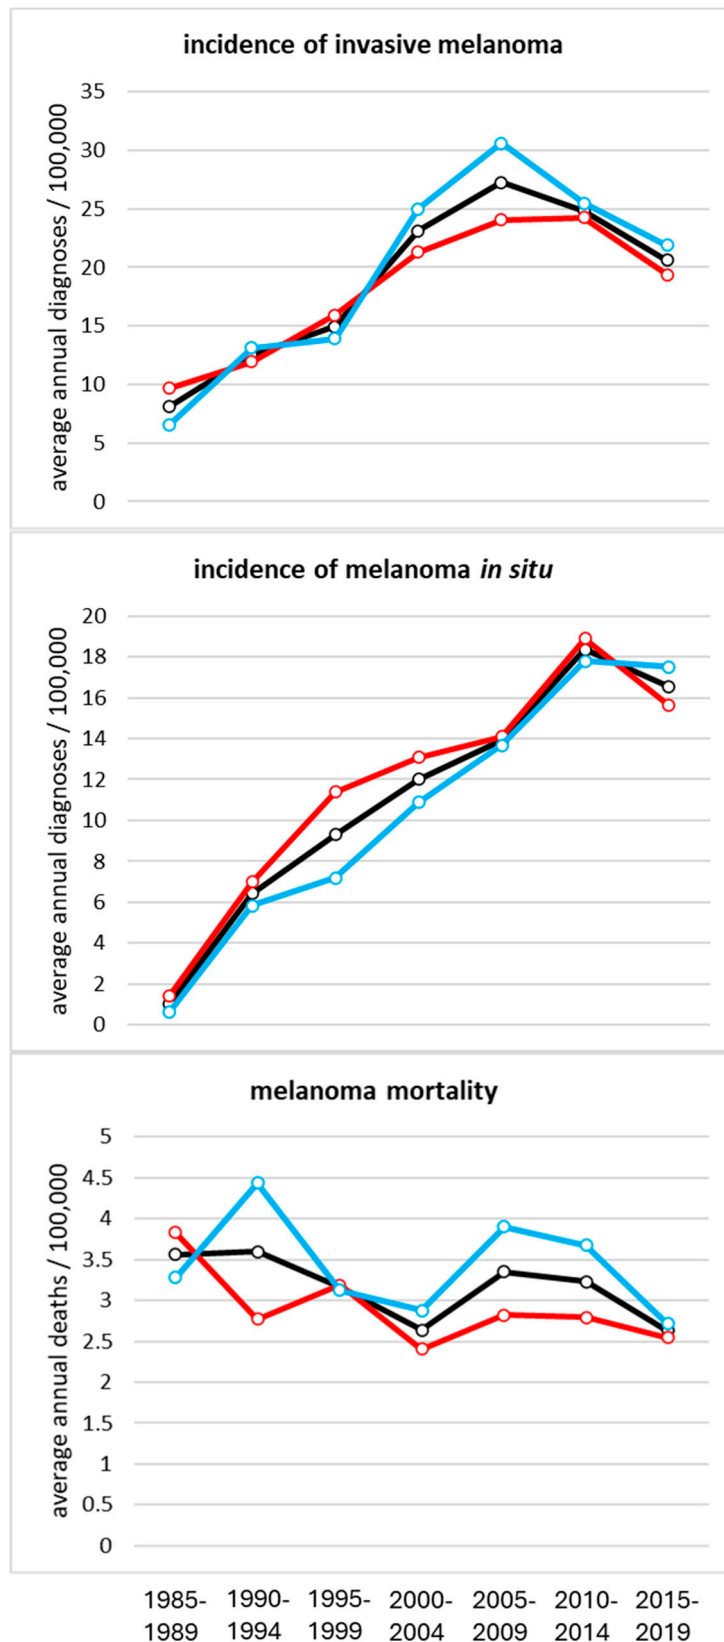

**Figure S1:** Line graphs showing trends of age-adjusted invasive melanoma incidence, melanoma *in situ* incidence, and melanoma mortality in the general population of Vorarlberg in 5-year intervals 1989-2019. Line colors: black, all; red, women; blue, men
